# Supplementary material for: Porous Carbon Boosted Non-Enzymatic Glutamate Detection with Ultra-High Sensitivity in Broad Range Using Cu Ions
Source: MDPI journal article supplement (doi:10.3390/nano12121987), 2022-06-09
Supplement: s1 [file s1]

Supplementary Materials

# Porous Carbon Boosted Non-Enzymatic Glutamate Detection with Ultra-High Sensitivity in Broad Range Using Cu Ions

Yifei Ma <sup>1</sup>, Jiemin Han <sup>1</sup>, Zhaomin Tong <sup>1</sup>, Jieling Qin <sup>2,\*</sup>, Mei Wang <sup>1,\*</sup>, Jonghwan Suhr <sup>3,4</sup>, Jaedo Nam <sup>3</sup>, Liantuan Xiao <sup>1</sup>, Suotang Jia <sup>1</sup> and Xuyuan Chen <sup>1,5</sup>

<sup>1</sup> State Key Laboratory of Quantum Optics and Quantum Optics Devices, Institute of Laser Spectroscopy, Collaborative Innovation Center of Extreme Optics, Shanxi University, Taiyuan 030006, China; mayifei@sxu.edu.cn (Y.M.); jiemin.han@foxmail.com (J.H.); zhaomin.tong@sxu.edu.cn (Z.T.); xlt@sxu.edu.cn (L.X.); tjia@sxu.edu.cn (S.J.); xuyuan.chen@usn.no (X.C.)

<sup>2</sup> Tongji University Cancer Center, Shanghai Tenth People's Hospital of Tongji University, School of Medicine, Tongji University, Shanghai 200092, China

<sup>3</sup> Department of Polymer Science and Engineering, Sungkyunkwan University, Suwon 16419, Korea; suhr@skku.edu (J.S.); jdnam@skku.edu (J.N.)

<sup>4</sup> School of Mechanical Engineering, Sungkyunkwan University, Suwon 16419, Korea

<sup>5</sup> Department of Micro- and Nanosystem Technology, Faculty of Technology and Maritime Sciences, University College of Southeast Norway, 3184 Borre, Norway

\* Correspondence: qinjieling770@hotmail.com (J.Q.); wangmei@sxu.edu.cn (M.W.)

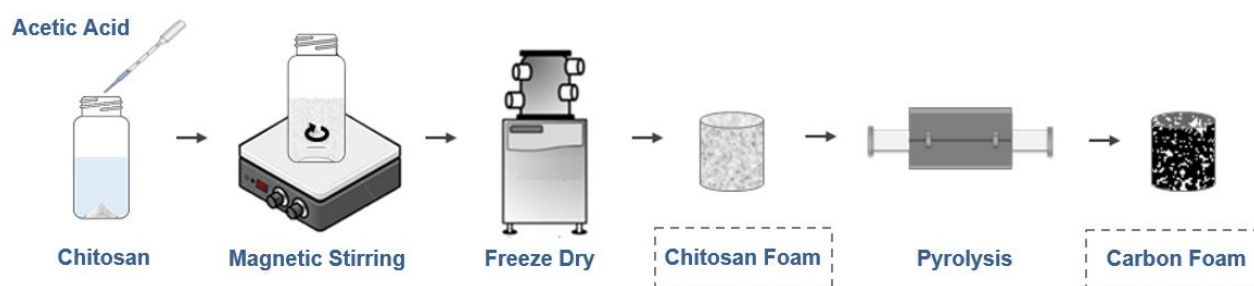

**Figure S1.** Scheme of the synthesis process of chitosan-derived graphitic carbon foams.

**Table S1.** EIS data collected from the carbon foam electrode and gold electrode:  $R_{et}$ ,  $C$ , and  $S_A$  represent the electron-transfer resistance, the double layer capacitance, and the surface area, respectively.

| Electrode        | $R_{et}$ ( $\Omega/\text{cm}^2$ ) | $C$ ( $\times 10^{-6}$ F/g) | $S_A$ ( $\text{cm}^2/\text{g}$ ) |
|------------------|-----------------------------------|-----------------------------|----------------------------------|
| Carbon electrode | 0.003388                          | 233.1                       | 11.66                            |
| Gold electrode   | 3.463                             | 19.5                        | 0.98                             |

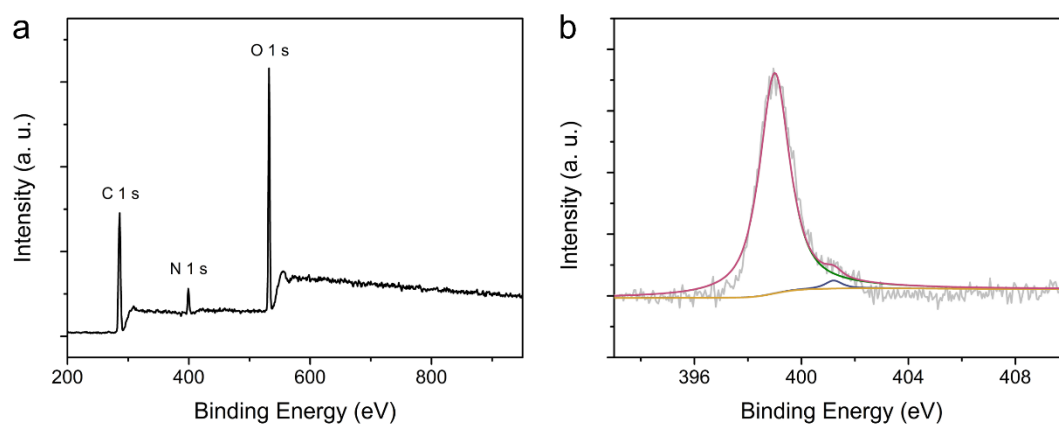

**Figure S2.** XPS wide scan spectrum (a) and deconvoluted spectra of N 1 s (b) of chitosan foam.

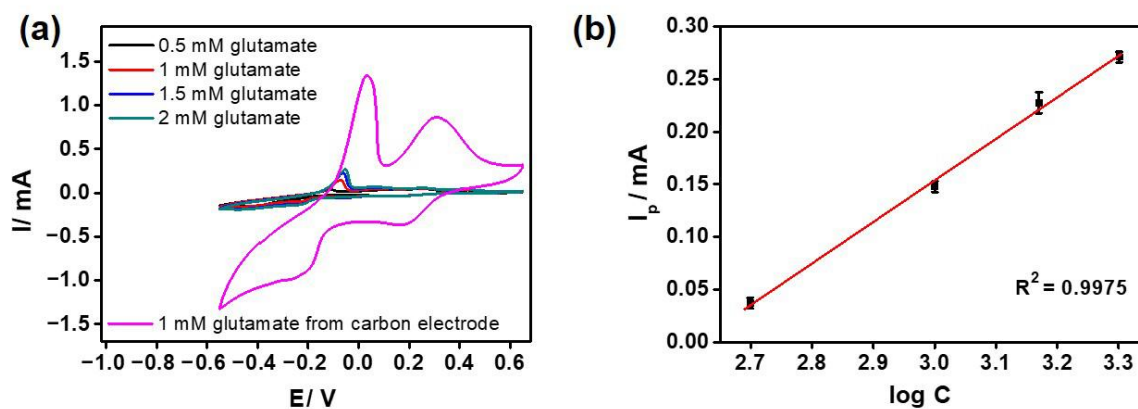

**Figure S3.** (a) Cyclic voltammograms of flat gold electrode for the detection of different concentrations of glutamates (0.5 mM, 1 mM, 1.5 mM, and 2 mM) and carbon electrode for the detection of 1 mM glutamate in 10 mM PBS containing 4 mM  $\text{CuCl}_2$ . The scan rate is 20 mV/s; (b) Calibration curve of peak currents of anodic peak in (a) vs.  $\log C$ .

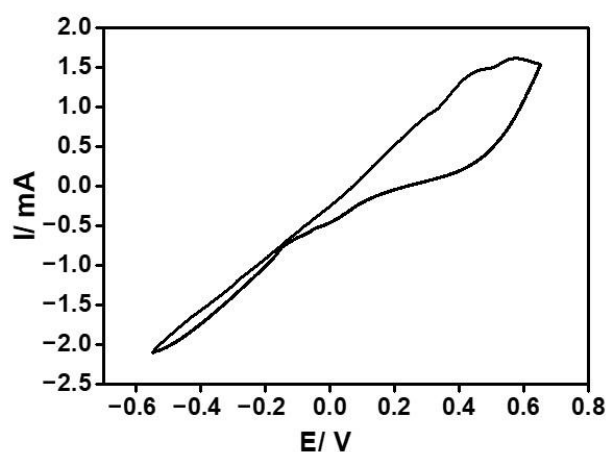

**Figure S4.** CV curve of the 4 mM  $\text{CuCl}_2$  aqueous solution measured using the carbon foam electrode.

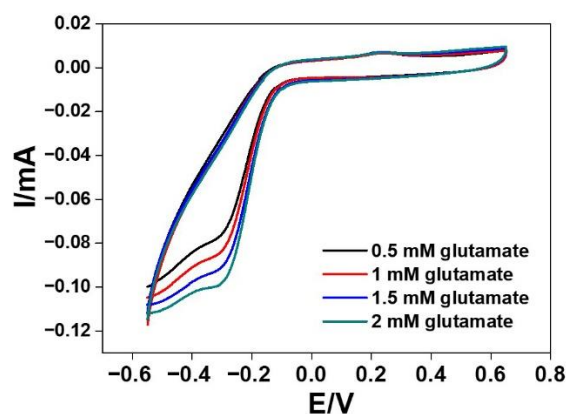

**Figure S5.** Cyclic voltammograms of carbon foam electrode for the detection the different concentrations of glutamates (0.5 mM, 1 mM, 1.5 mM and 2 mM) in 10 mM PBS without  $\text{CuCl}_2$ .

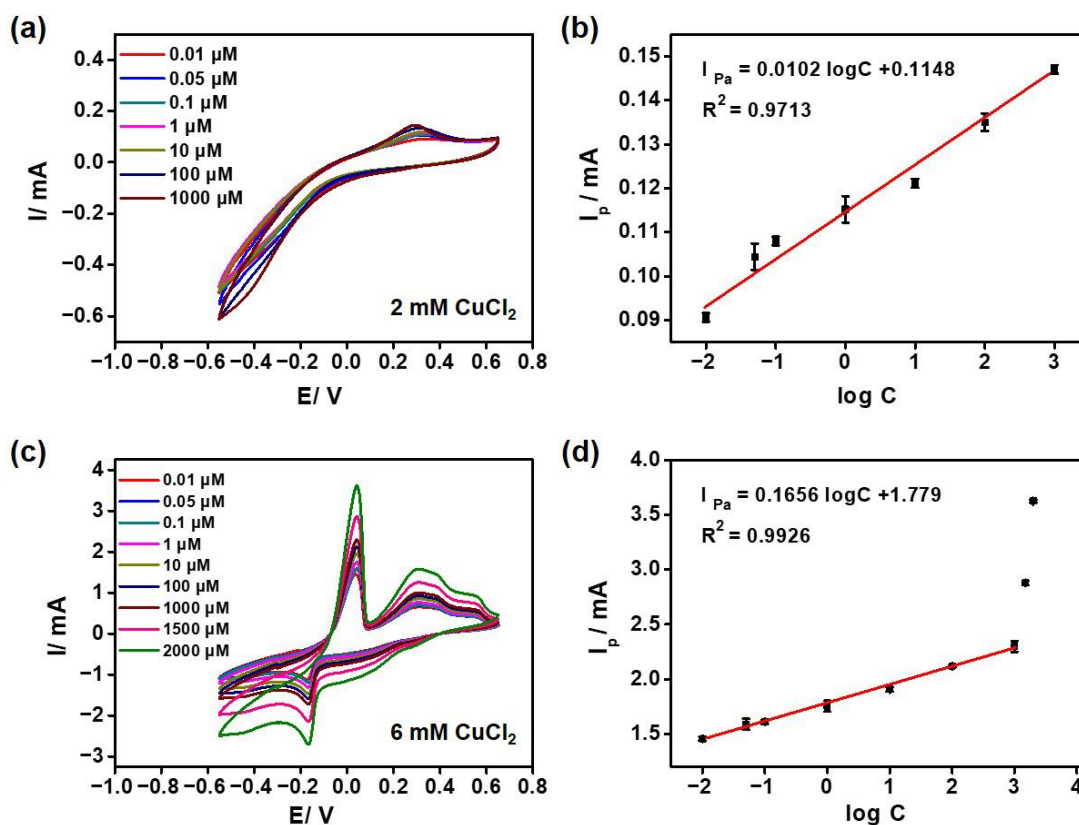

**Figure S6.** (a) Cyclic voltammograms of carbon based electrode for the detection the different concentrations of glutamates in 10 mM PBS containing 2 mM  $\text{CuCl}_2$ ; (b) Calibration curve of  $I_p$  vs.  $\log C$  of anodic peak in (a); (c) Cyclic voltammograms of carbon based electrode for the detection the different concentrations of glutamates in 10 mM PBS containing 6 mM  $\text{CuCl}_2$ ; (d) Calibration curve of  $I_p$  vs.  $\log C$  of anodic peak 1 in (c).
